# Supplementary material for: Periodontal disease is associated with increased gut colonization of pathogenic Haemophilus parainfluenzae in patients with Crohn’s disease
Source: PubMed Central journal article supplement — Cell Rep. Author manuscript; Available in PMC 2023 Oct 23. (PMC10415533; doi:10.1016/j.celrep.2023.112120), 2023-02-13
Supplement: NIHMS1878895-supplement-1.pdf [file NIHMS1878895-supplement-1.pdf]

Cell Reports, Volume 42

## Supplemental information

### **Periodontal disease is associated with increased gut colonization of pathogenic *Haemophilus* *parainfluenzae* in patients with Crohn's disease**

**Jiho Sohn, Lu Li, Lixia Zhang, Robert J. Genco, Karen L. Falkner, Hervé Tettelin, Aryn M. Rowsam, Dominic J. Smiraglia, Jan M. Novak, Patricia I. Diaz, Yijun Sun, and Keith L. Kirkwood**

# Supplementary Figure 1

## Saliva

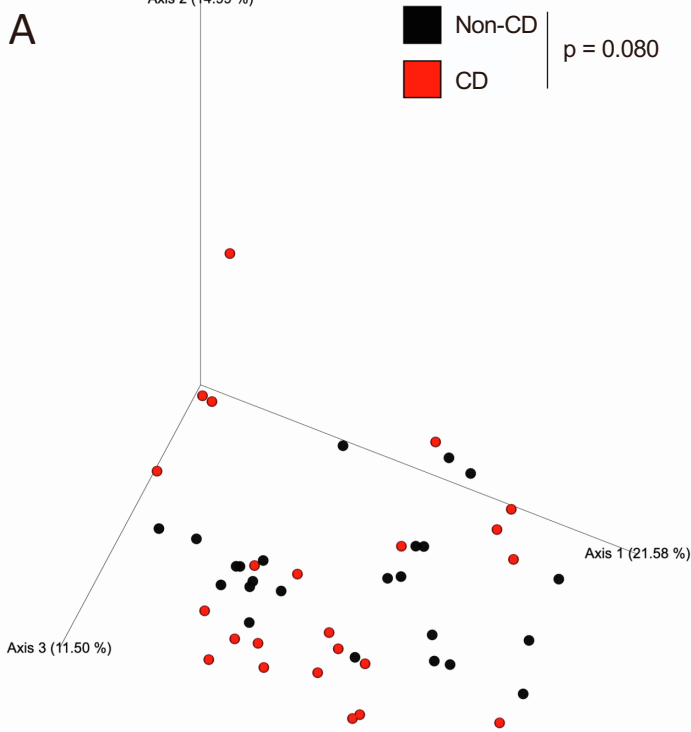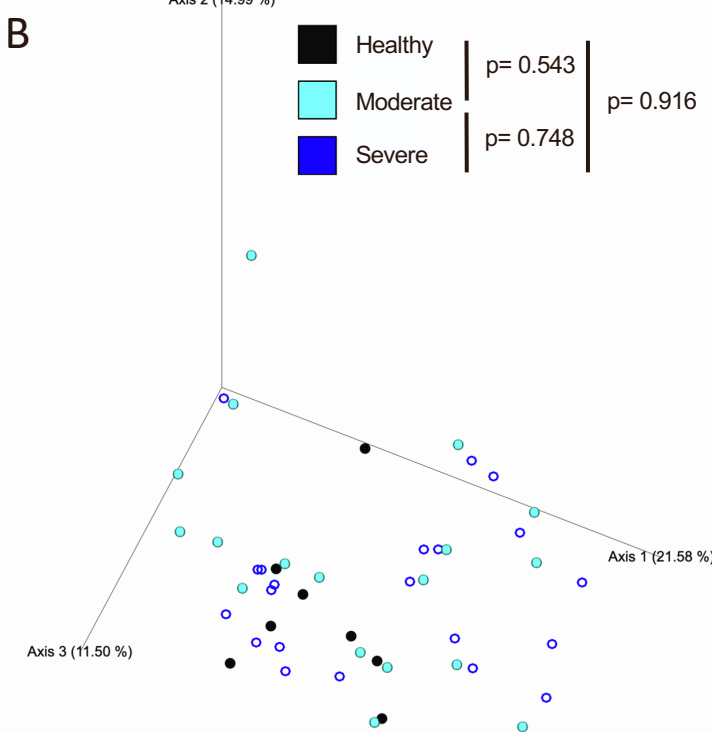

## Fecal

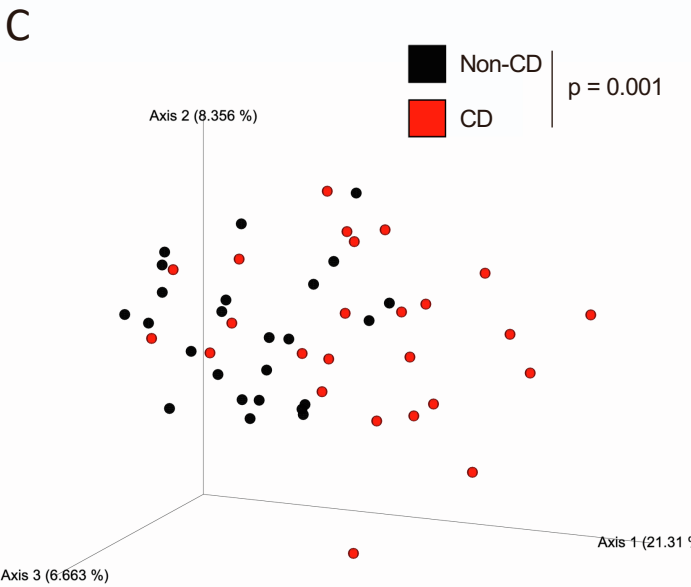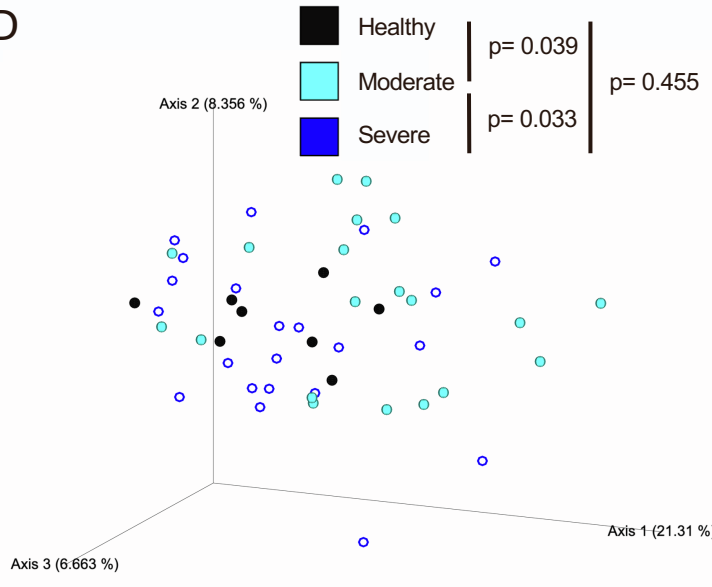

**Figure S1. Salivary and fecal beta diversity measurements associated with CD or PD.**

Related to Figure 1. Salivary and fecal beta diversity was measured by unweighted-UNiFrac distance based on (A,C) CD ((n=25 in non-CD and n =25 in CD) or (B,D) PD (n=8 in healthy, n=21 in moderate, and n=21 in severe) status. Statistical testing was performed using PERMANOVA.

# Supplementary Figure 2

## Saliva

A

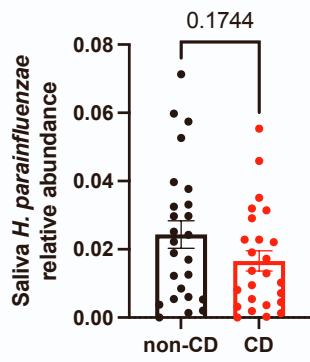

B

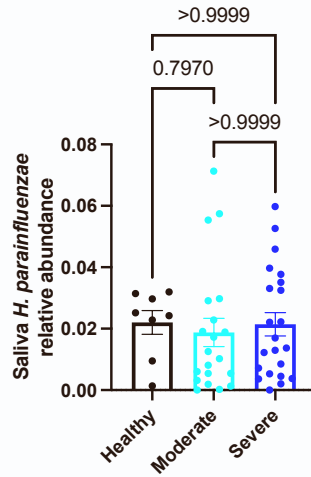

C

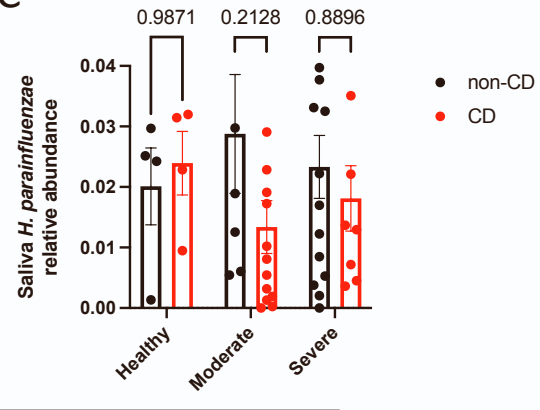

Periodontal disease status

## Subgingival plaque

D

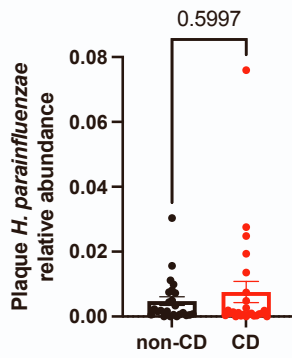

E

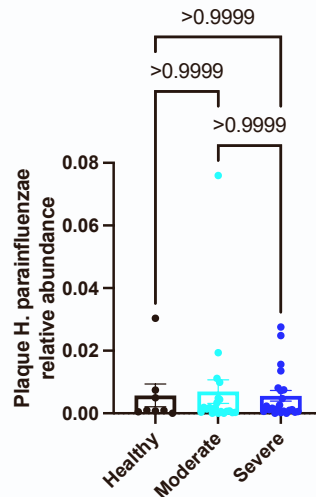

F

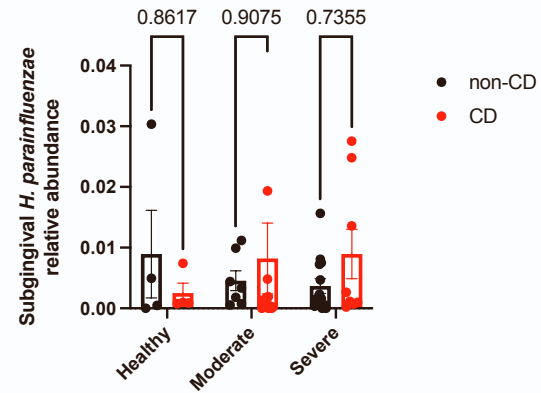

Periodontal disease status

## Fecal

G

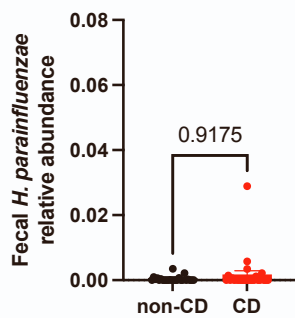

H

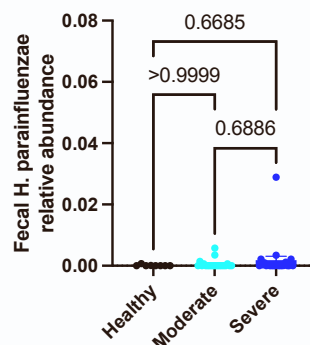

I

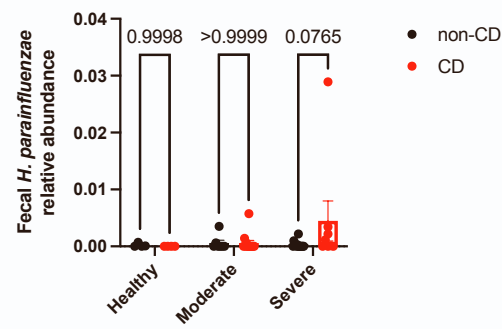

Periodontal disease status

**Figure S2. The relative abundance of *H. parainfluenzae* is unchanged in saliva, subgingival or fecal samples.** Related to Figure 2. The relative abundance of *H. parainfluenzae* in fecal samples based on (A,D,G) CD (n=25 in non-CD and n =25 in CD) , (B,E,I) PD (n=8 in healthy, n=21 in moderate, and n=21 in severe) status, or (C,G,J) stratified by CD and PD status (n=4 in healthy PD and non-CD, n= 4 in healthy PD and CD, n=7 in moderate PD and non-CD, n=13 in moderate PD and CD, n=14 in severe PD and non-CD, and n=8 in severe PD and CD) . Statistical testing was performed using (A,D,H) Mann-Whitney U, (B,E,H) Kruskal-Wallis followed by Dunn's multiple comparisons test, and (C,F,I) two-way ANOVA followed by Sidak's multiple comparisons tests. Data are represented as mean  $\pm$  SEM.

Supplementary Figure 3

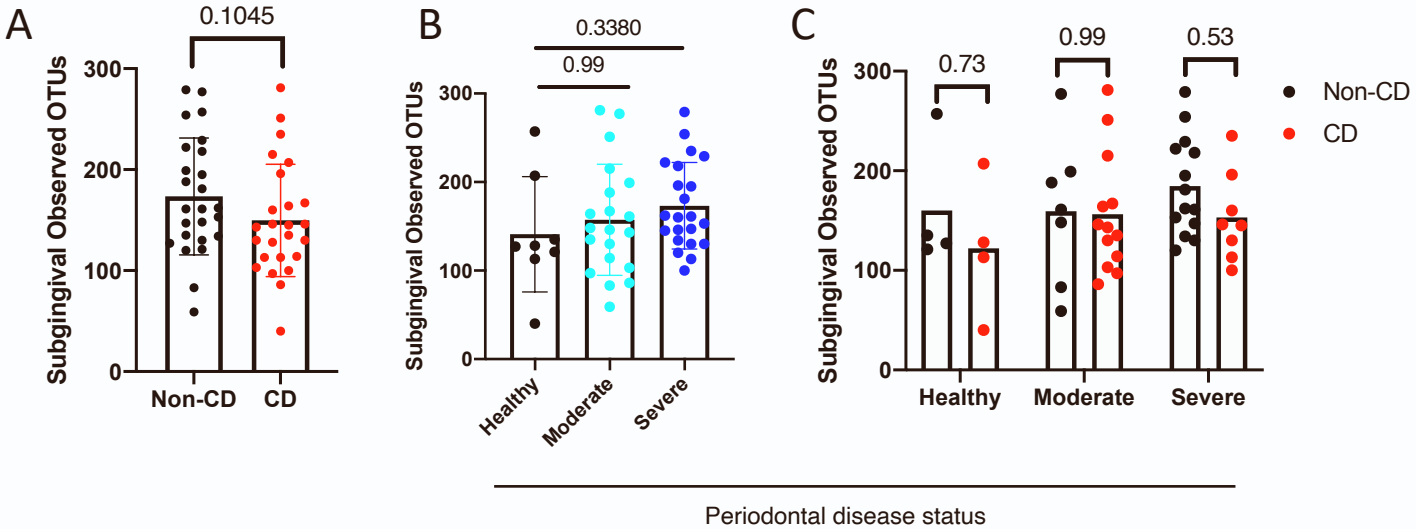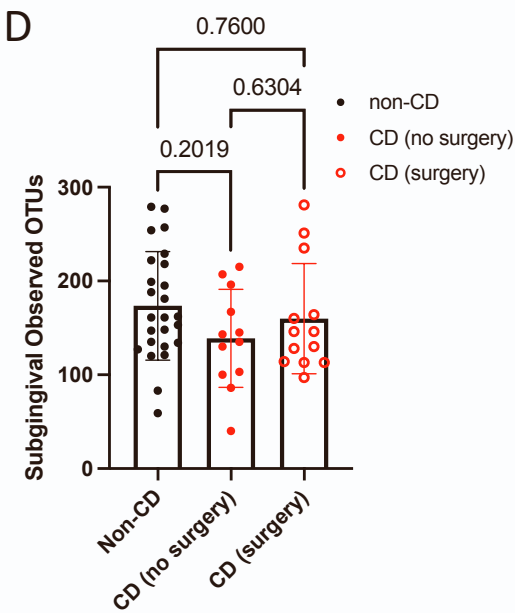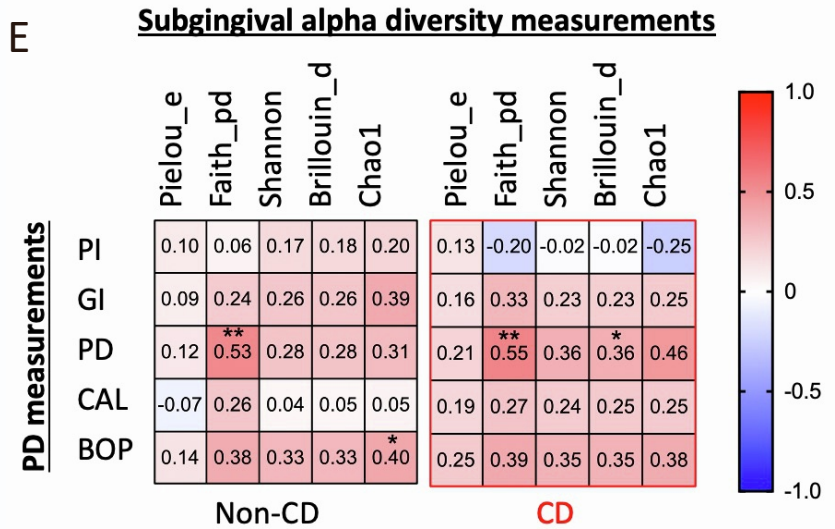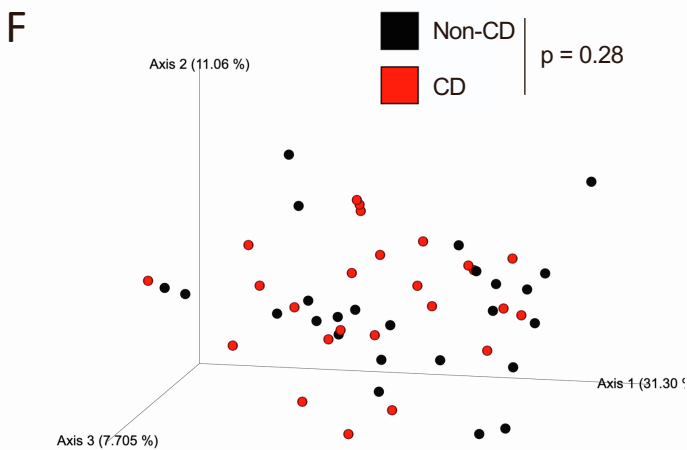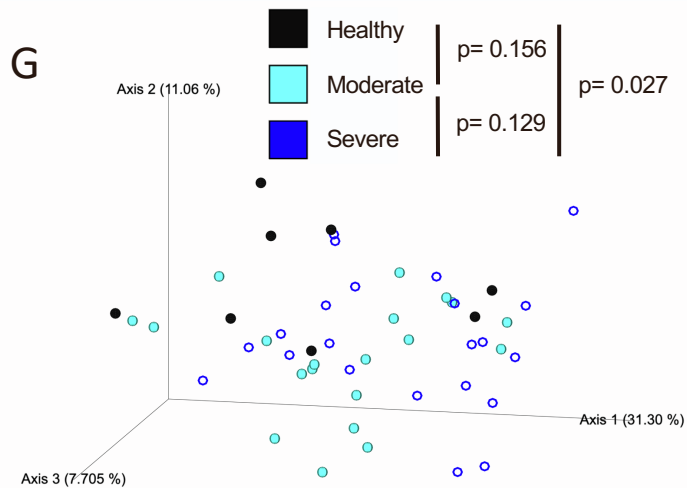

**Figure S3. No significant changes in subgingival microbiota alpha-diversity with CD or PD.**

Related to Figure 1. Subgingival alpha diversity based on (A) CD (n=25 in non-CD and n =25 in CD), (B) PD (n=8 in healthy, n=21 in moderate, and n=21 in severe), (C) stratified by CD and PD status (n=4 in healthy PD and non-CD, n= 4 in healthy PD and CD, n=7 in moderate PD and non-CD, n=13 in moderate PD and CD, n=14 in severe PD and non-CD, and n=8 in severe PD and CD), or (D) CD surgery status ((n=25 in non-CD, n=12 in CD no surgery, n=13 in CD surgery) represented by observed OTUs. (E) Correlation matrix of subgingival alpha diversity measures and whole mouth periodontal clinical measurements (n=25 each group). pielou\_e: Pielou's Evenness index, faith\_pd: Faith's phylogenetic diversity, shannon: Shannon diversity index, brillouin\_d: Brillouin index, chao1: Chao1 richness estimate, PI: plaque index, GI: gingival index, PD: mean pocket depth, GR: gingival recession, CAL: mean clinical attachment loss, BOP: bleeding on probing. Beta diversity was measured by unweighted-UNiFrac distance based on (A) CD or (B) PD status. Statistical testing was performed using (A) Mann-Whitney U, (B,D) Kruskal-Wallis followed by Dunn's multiple comparisons test, (C)Two-way ANOVA followed by Sidak's multiple comparisons test. (E) Pearson correlation tests with coefficients shown in color scale. A two-tailed test was used to calculate p-values. (F,G) Beta diversity comparison was performed using PERMANOVA. Data are represented as mean  $\pm$  SEM.

Supplementary Figure 4

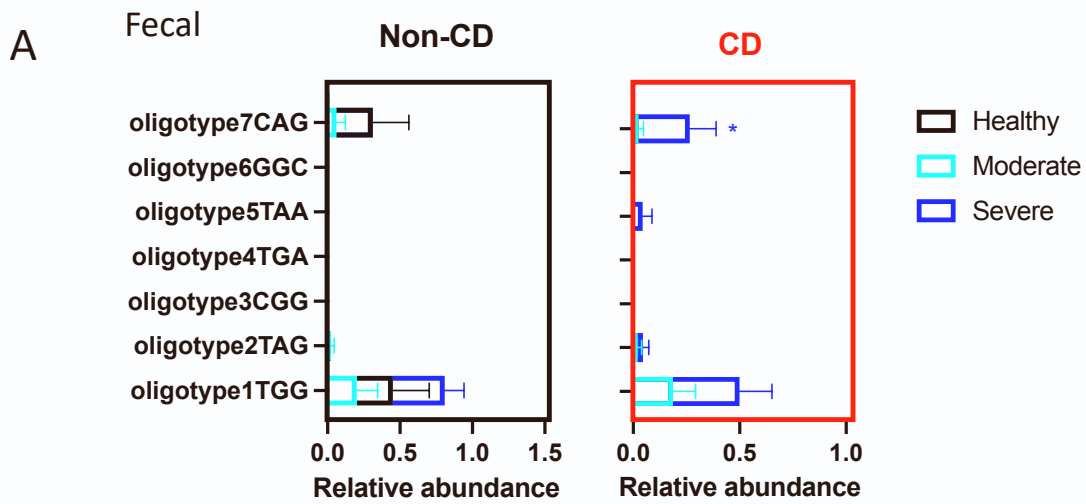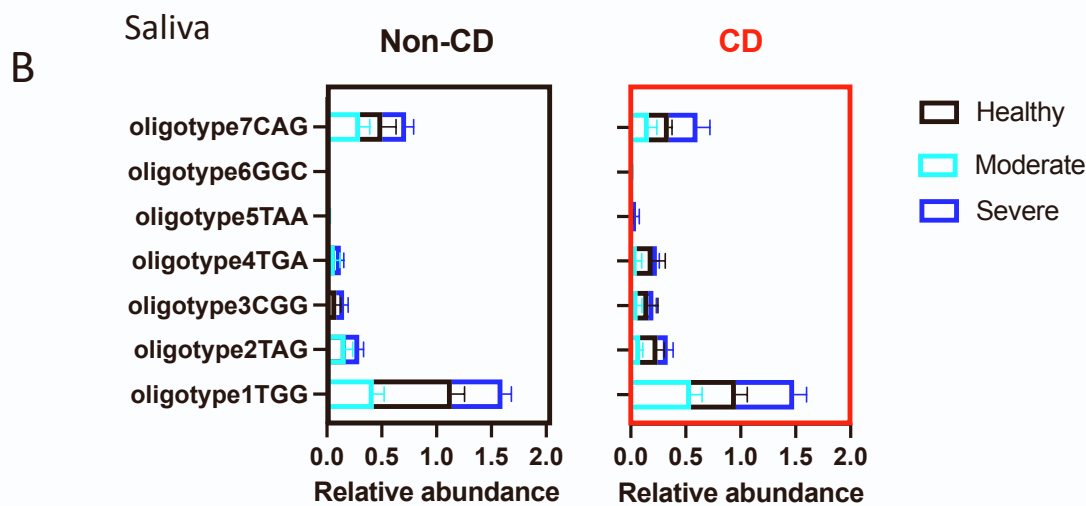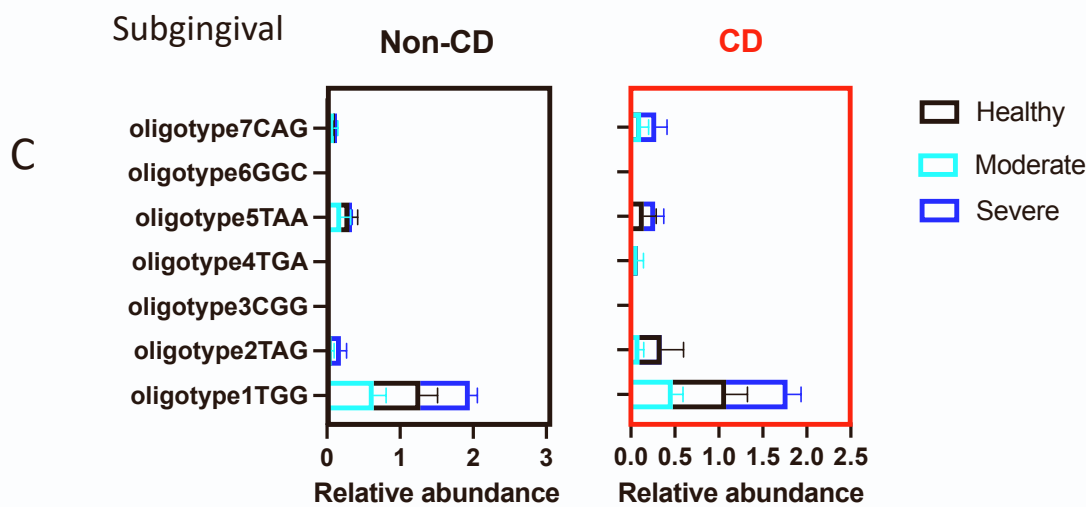



**Figure S4. Oligotyping analysis of *H. parainfluenzae* 16S rRNA amplicon.** Related to Figure 2. Oligotypes of *H. parainfluenzae* in (A) fecal, (B) saliva, and (C) subgingival based on CD or PD status (n=4 in healthy PD and non-CD, n= 4 in healthy PD and CD, n=7 in moderate PD and non-CD, n=13 in moderate PD and CD, n=14 in severe PD and non-CD, and n=8 in severe PD and CD) represented on stacked bar plot. Statistical testing was performed using two-way ANOVA followed by Sidak's multiple comparisons test. \*Adjusted p-value <0.05

# Supplementary Figure 5

## Haemophilus parainfluenzae biotype III (S1p)

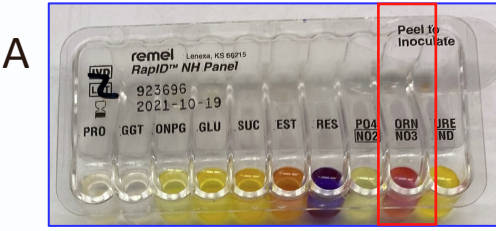

## Haemophilus parainfluenzae biotype V (S2)

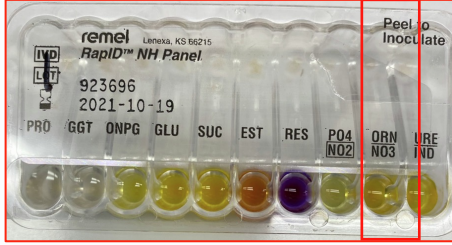

**B**

| ID  | Location | Biotype |
|-----|----------|---------|
| S1p | Saliva   | III     |
| S2  | Saliva   | V       |
| F2  | Fecal    | III     |
| F3p | Fecal    | V       |

**C**

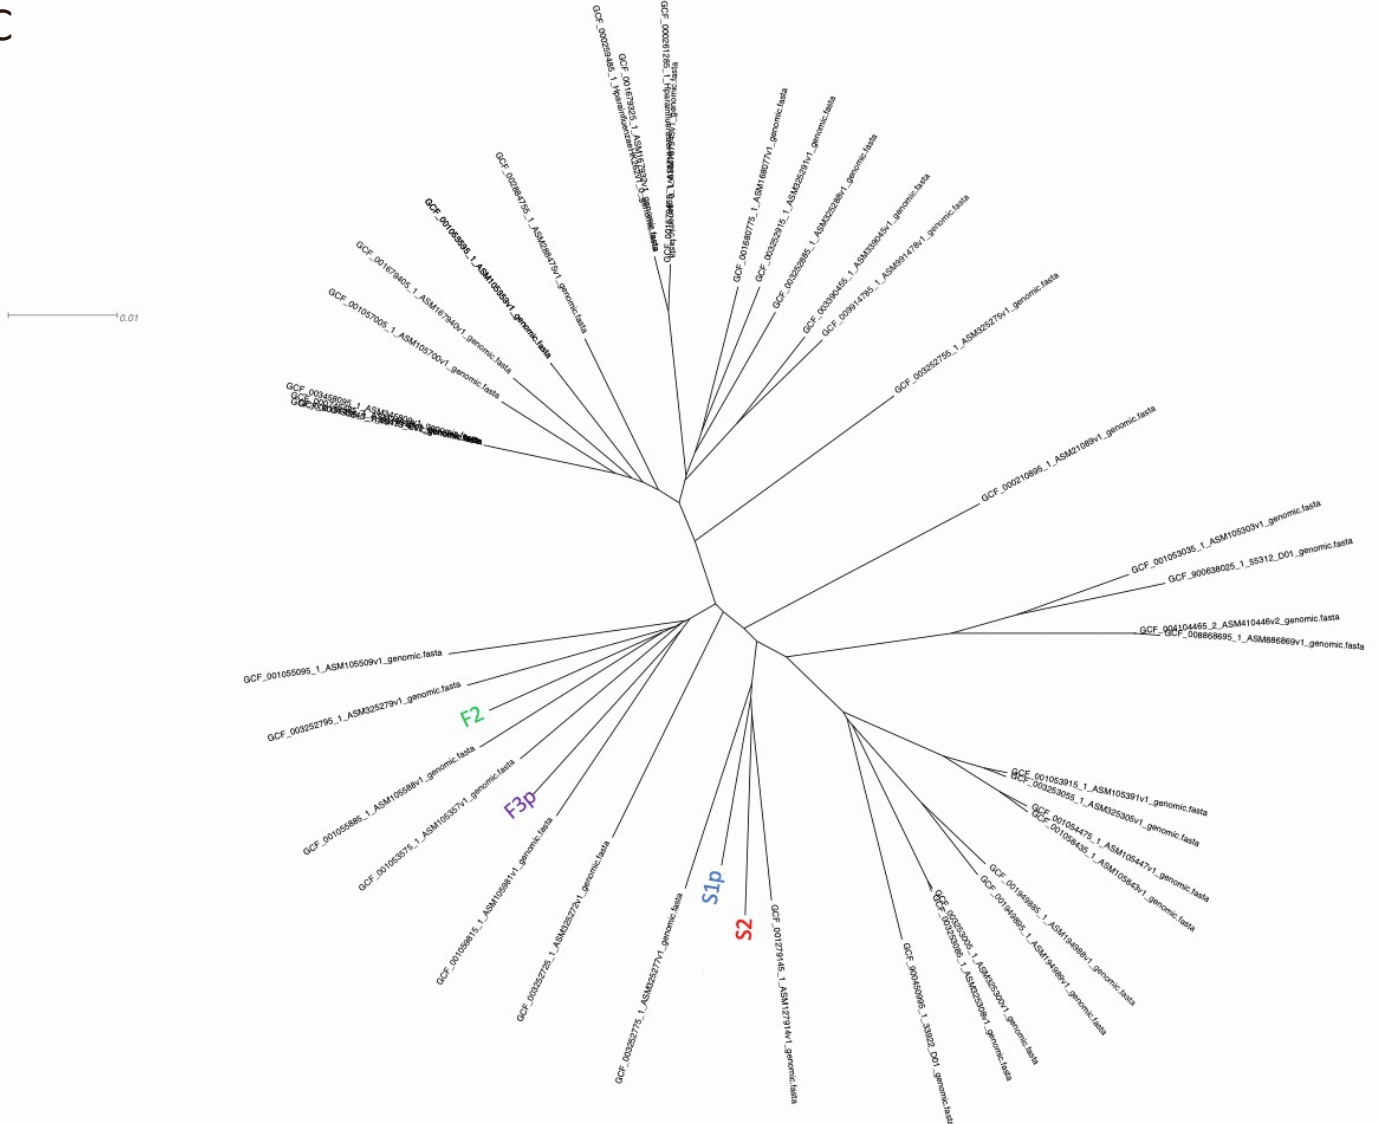

**Figure S5. Biochemical and genomic analysis of *H. parainfluenzae* strains.** Related to Figure 2. Biochemical assay to determine *H. parainfluenzae* biotype. (A) *H. parainfluenzae* biotype II (S1p and F2 strains) metabolizes ornithine, and *H. parainfluenzae* biotype V (S2 and F3p strains) does not metabolize ornithine. (B) Table summarizing *H. parainfluenzae* strain and biotype. (C) Whole genome-based phylogeny of *H. parainfluenzae* genomes. Isolated strains (S1p, S2, F2, and F3p) are highlighted in colors.

Supplementary Figure 6

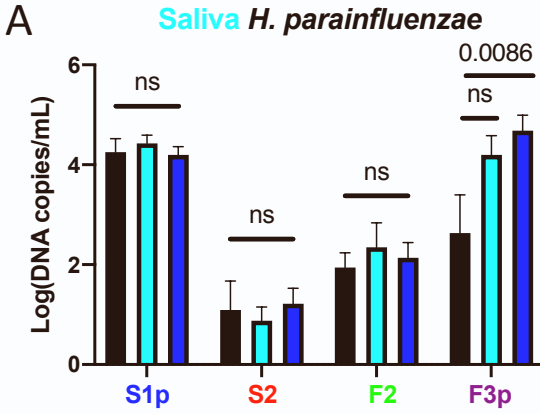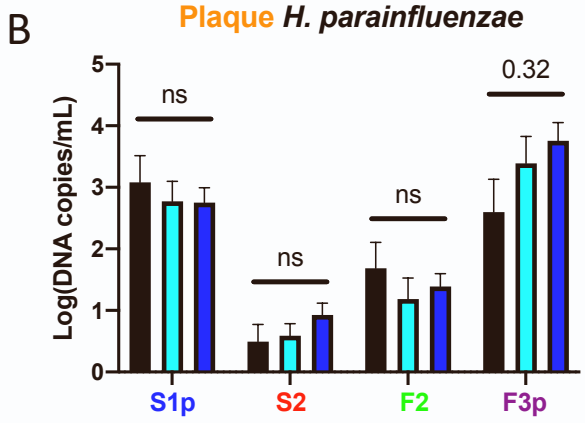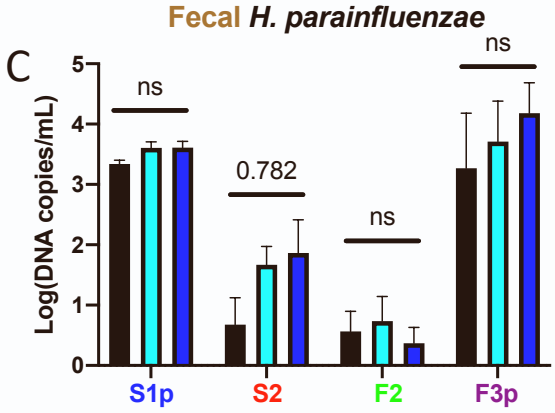

Healthy  
Moderate  
Severe

**Figure S6. Quantification of *H. parainfluenzae* strains in (A) saliva, (B) subgingival, and (C) fecal samples based on PD status.** Related to Figure 2. (n=8 in healthy, n=21 in moderate, and n=21 in severe) Statistical testing was performed using 2-way ANOVA and Sidak's multiple comparison test.

# Supplementary Figure 7

**A**

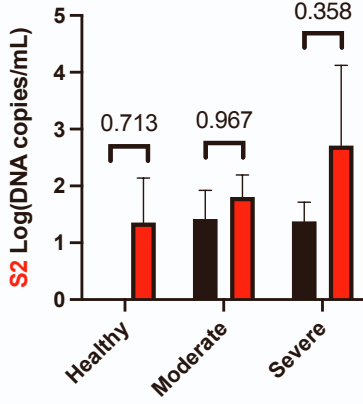

**B**

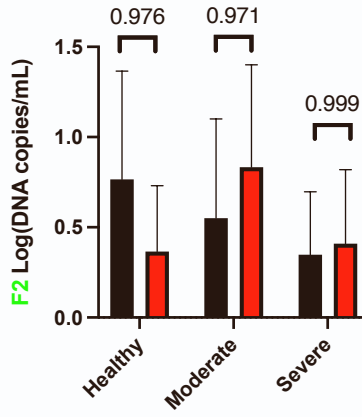

**C**

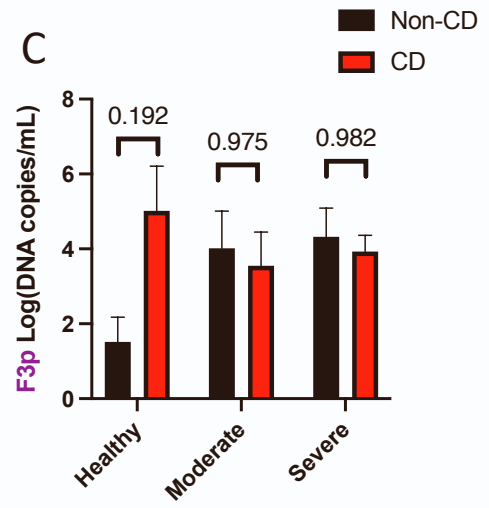

Periodontal disease status

**D**

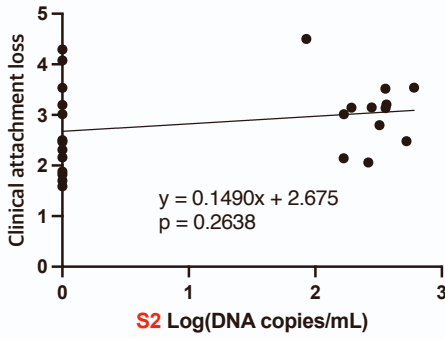

**E**

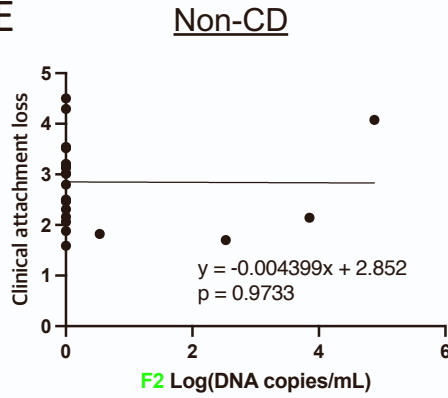

**F**

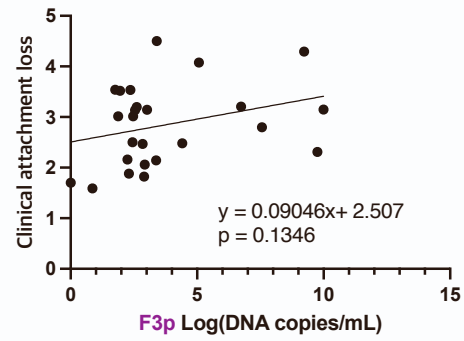

**G**

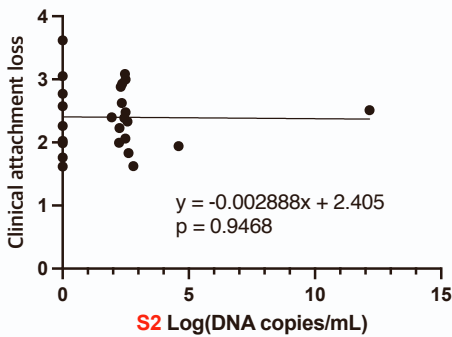

**H**

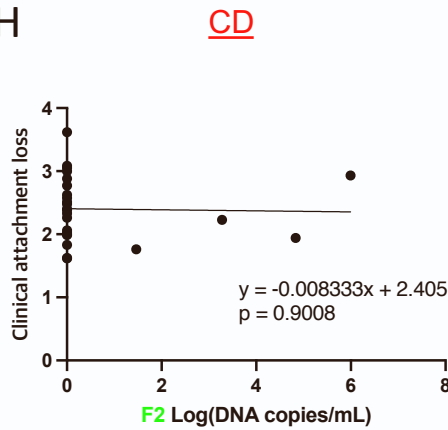

**I**

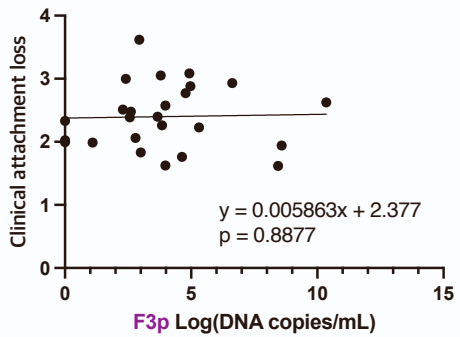

**Figure S7. Association between *H. parainfluenzae* strains and periodontal disease severity.** Related to Figure 2. (A) qPCR quantification of *H. parainfluenzae* strains (A) S2, (B) F2, and (C) F3p in fecal samples based on periodontal disease status in CD patients (n=4 in healthy PD and non-CD, n= 4 in healthy PD and CD, n=7 in moderate PD and non-CD, n=13 in moderate PD and CD, n=14 in severe PD and non-CD, and n=8 in severe PD and CD). (D-I) Pearson correlation analysis of fecal *H. parainfluenzae* strains S2, F2, and F3p log (DNA copies/mL) with clinical attachment loss in non-CD (n=25) and CD (n=25). Statistical testing was performed using (A-C) 2-way ANOVA and Sidak's multiple comparison test, and (D-I) two-tailed statistical test.

| <b>Strain</b> | <b>Fprward_seq</b>    | <b>Reverse_seq</b>   | <b>Internal Oligo</b> |
|---------------|-----------------------|----------------------|-----------------------|
| S1p           | TTTTCACGCAGTTTCACCAA  | CCCACAATAACGCAGAACCT | CAACCCGTGGCAAGGGCTTG  |
| S2            | GGACTGTAATAGCGGAAACGA | TTACCGGCAGAAACTGAACC | TGCCCCACAAAGCGATGGTT  |
| F2            | ATTTTGGATCGAAGGGGAAG  | GGCATCGTCTTGTGTTCC   | TGGCGGGAGTTTGCAGAGA   |
| F3p           | TCTTTACCCTGCGCATTTTT  | ACACACCGTTTGGGAAAGAG | TGCCATCATCATCCACCGCC  |



**Table S1. *H. parainfluenzae* strain-specific qPCR primer and probe sequences.** Related to the design of strain-specific primers for *H. parainfluenzae* strains in STAR Methods section.

| Dataset 1 (MTX EC)                | Dataset 2 (MGX Species)     | Spearman | P value  | FDR p    |
|-----------------------------------|-----------------------------|----------|----------|----------|
| 4.1.1.17: Ornithine decarboxylase | Haemophilus parainfluenzae  | 0.626    | 4.41E-84 | 9.08E-80 |
| 4.1.1.17: Ornithine decarboxylase | Veillonella unclassified    | 0.422    | 3.72E-34 | 5.37E-31 |
| 4.1.1.17: Ornithine decarboxylase | Veillonella dispar          | 0.307    | 4.96E-18 | 1.59E-15 |
| 4.1.1.17: Ornithine decarboxylase | Veillonella atypica         | 0.299    | 3.29E-17 | 1.00E-14 |
| 4.1.1.17: Ornithine decarboxylase | Streptococcus parasanguinis | 0.298    | 5.18E-17 | 1.55E-14 |
| 4.1.1.17: Ornithine decarboxylase | Streptococcus salivarius    | 0.247    | 5.19E-12 | 8.51E-10 |
| 4.1.1.17: Ornithine decarboxylase | Veillonella parvula         | 0.232    | 9.64E-11 | 1.35E-08 |
| 4.1.1.17: Ornithine decarboxylase | Oscillibacter unclassified  | -0.145   | 6.27E-05 | 1.77E-03 |
| 4.1.1.17: Ornithine decarboxylase | Lachnospiraceae bacterium   | -0.142   | 8.37E-05 | 2.23E-03 |
| 4.1.1.17: Ornithine decarboxylase | Flavonifractor plautii      | -0.141   | 9.91E-05 | 2.55E-03 |
| 4.1.1.17: Ornithine decarboxylase | Klebsiella pneumoniae       | 0.135    | 1.93E-04 | 4.27E-03 |
| 4.1.1.17: Ornithine decarboxylase | Clostridium boltea          | -0.134   | 2.20E-04 | 4.71E-03 |
| 4.1.1.17: Ornithine decarboxylase | Parabacteroides goldsteinii | -0.123   | 6.50E-04 | 1.07E-02 |
| 4.1.1.17: Ornithine decarboxylase | Clostridium symbiosum       | -0.113   | 1.73E-03 | 2.18E-02 |
| 4.1.1.17: Ornithine decarboxylase | Bacteroides intestinalis    | -0.113   | 1.84E-03 | 2.27E-02 |
| 4.1.1.17: Ornithine decarboxylase | Parabacteroides distasonis  | -0.104   | 3.97E-03 | 3.93E-02 |

**Table S4. Significantly associated species with microbial ornithine decarboxylase activity.**

Related to Figure 6. This table was adapted from cross-data type association analysis from the original paper describing iHMP2 dataset<sup>1</sup>. Subject-specific random effect and covariate effects were minimized by first residualizing using a linear mixed effect model. Spearman associations using HALLA 0.8.17 (hierarchical all-against-all association testing) and FDR correction were performed for statistical testing. MTX: metatranscriptomics, MGX: metagenomics.

## Reference

1. Lloyd-Price J, Arze C, Ananthakrishnan AN, Schirmer M, Avila-Pacheco J, Poon TW, et al. Multi-omics of the gut microbial ecosystem in inflammatory bowel diseases. *Nature*. 2019;569(7758):655-62; doi: 10.1038/s41586-019-1237-9.
